# Supplementary material
Source: PubMed Central journal article supplement (PMC8439151)
Supplement: NIHMS1725588-supplement-Supplementary_Information.pdf [file NIHMS1725588-supplement-Supplementary_Information.pdf]

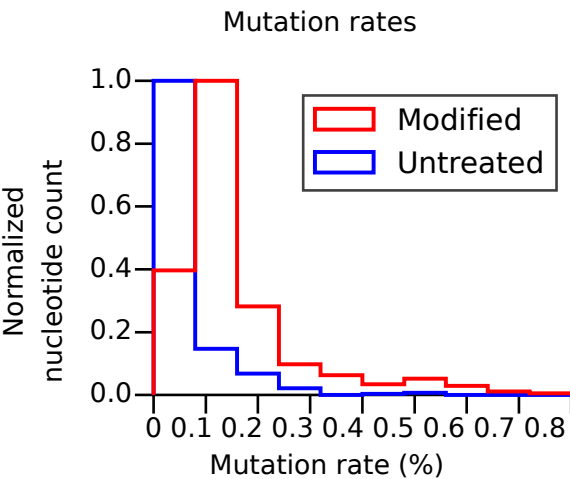

Mutation rates of ABAT PAS RNA SHAPE-MaP data from Replicate 1

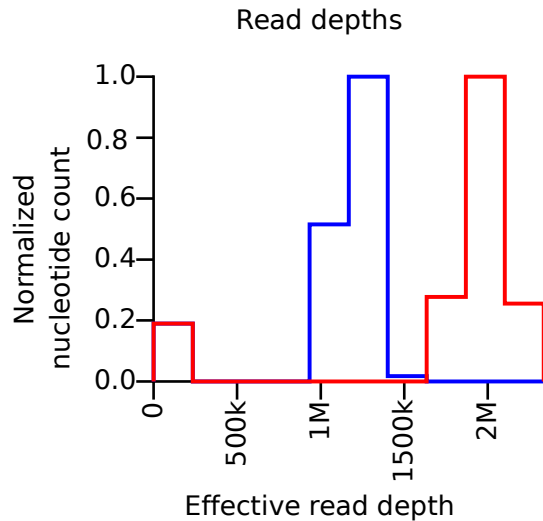

Read depths of ABAT PAS RNA SHAPE-MaP data from Replicate 1

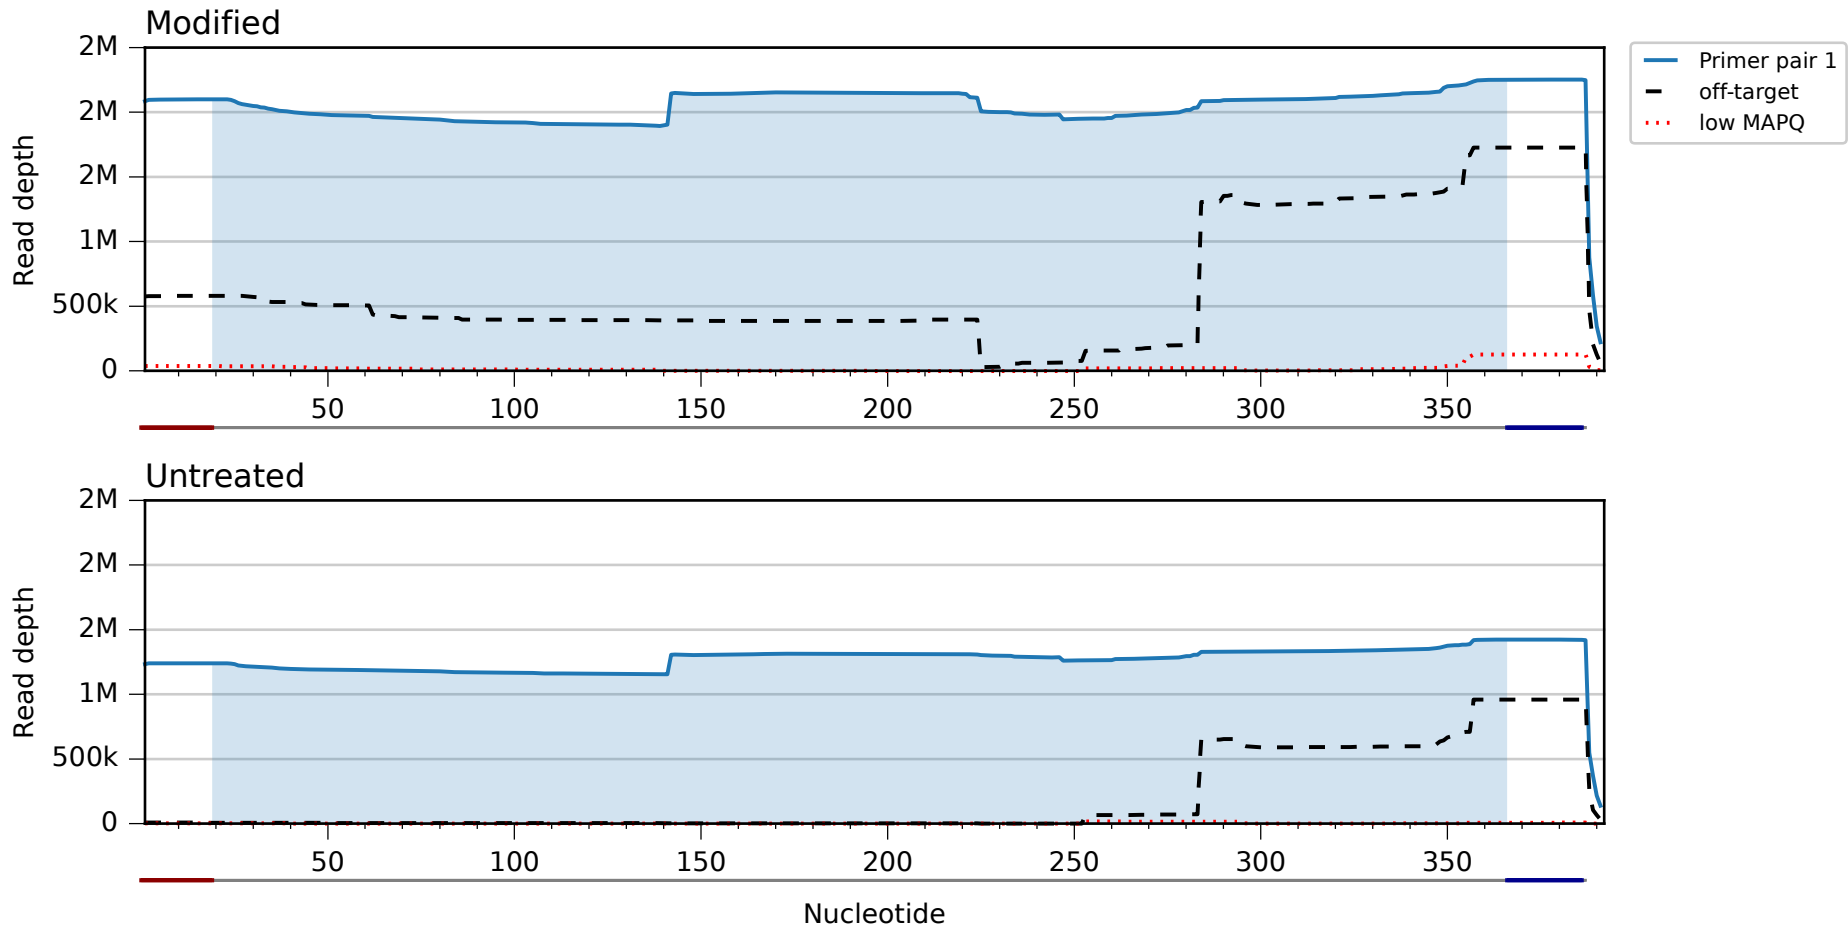

Read depth of ABAT PAS RNA SHAPE-MaP data from Replicate 1

Shape reactivity, mutation rate and read depth of ABAT PAS RNA  
SHAPE-MaP data from Replicate 1

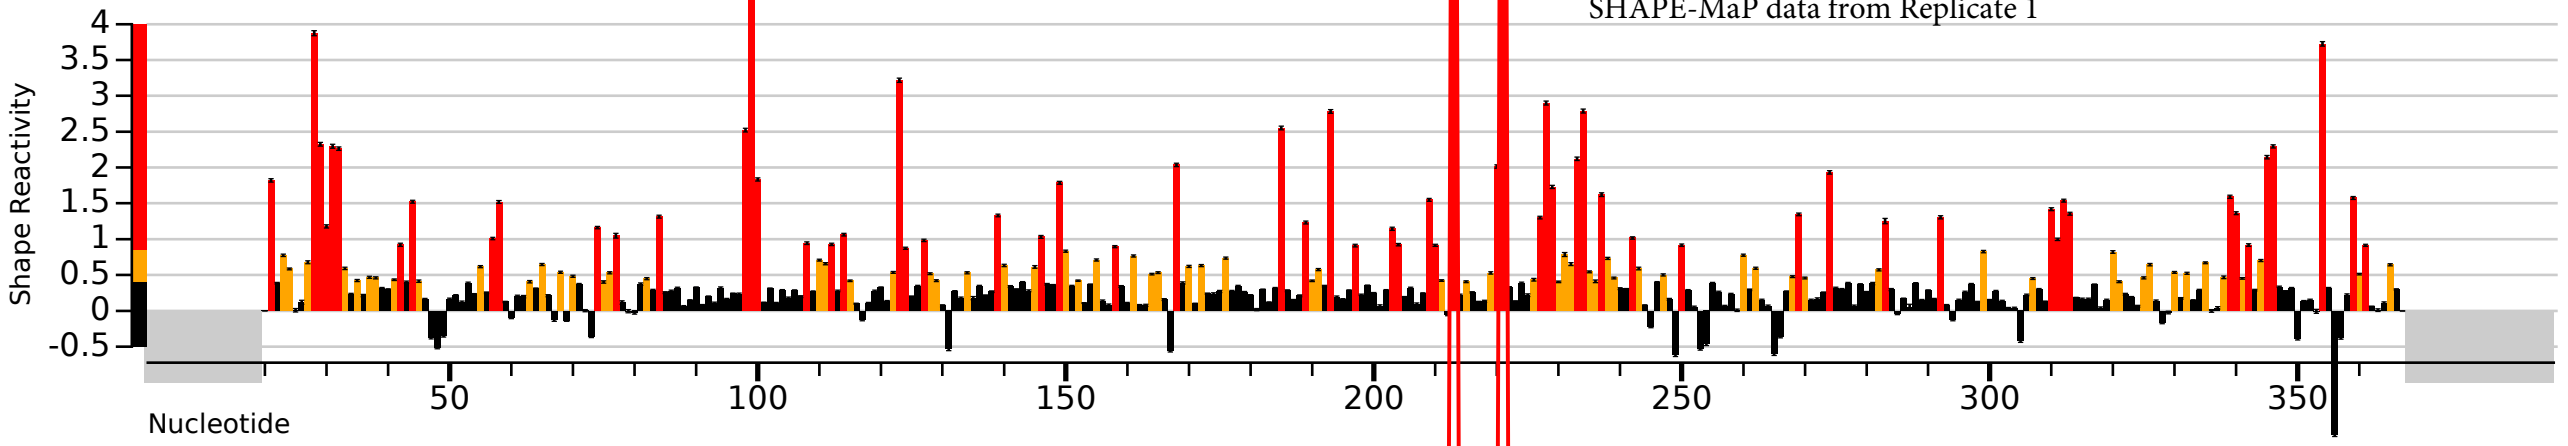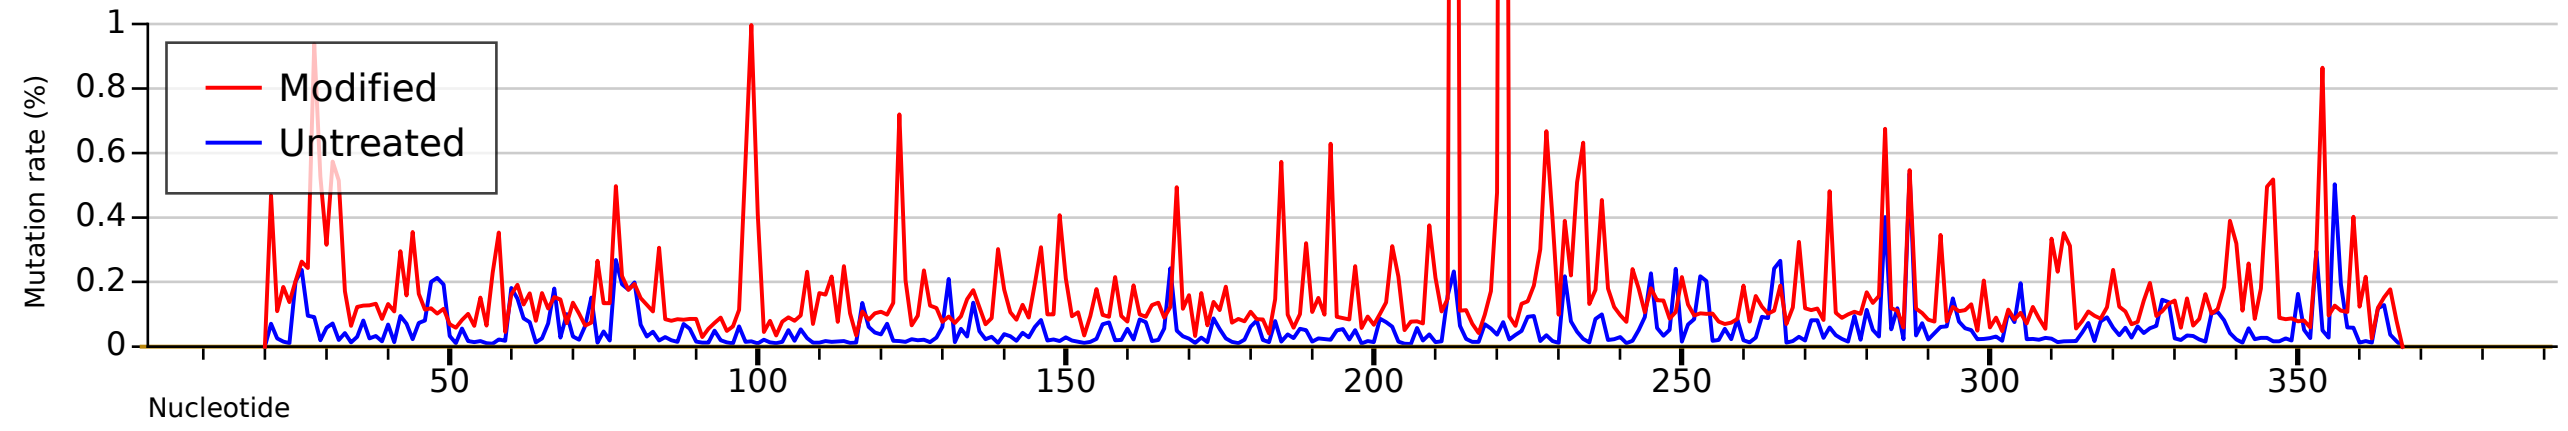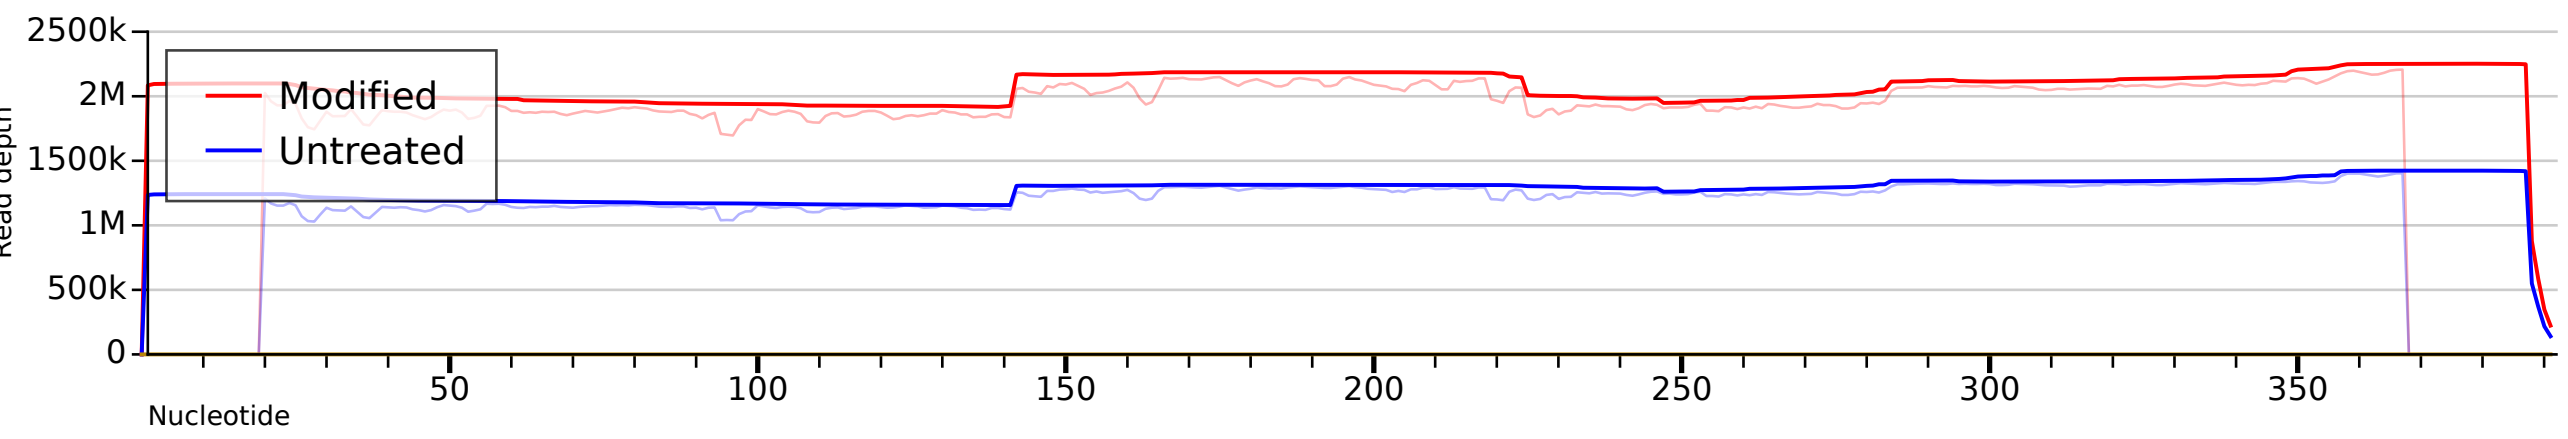

Mutation rates

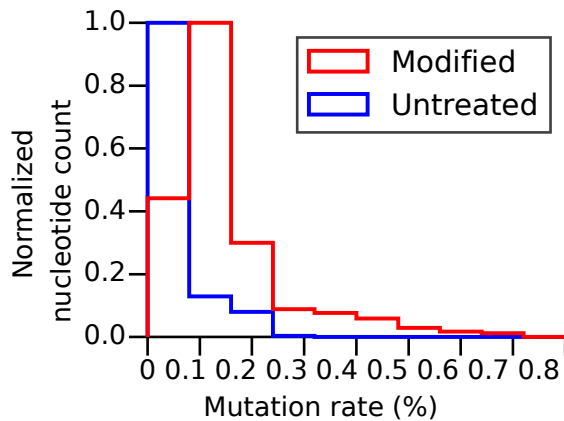

Mutation rates of ABAT PAS RNA SHAPE-MaP data from Replicate 2

Read depths

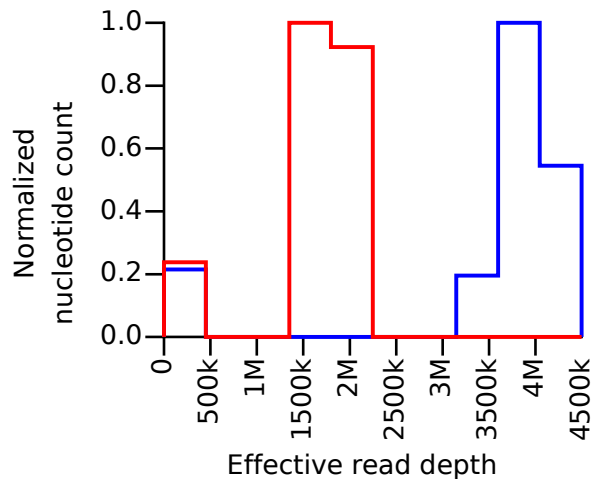

Read depths of ABAT PAS RNA SHAPE-MaP data from Replicate 2

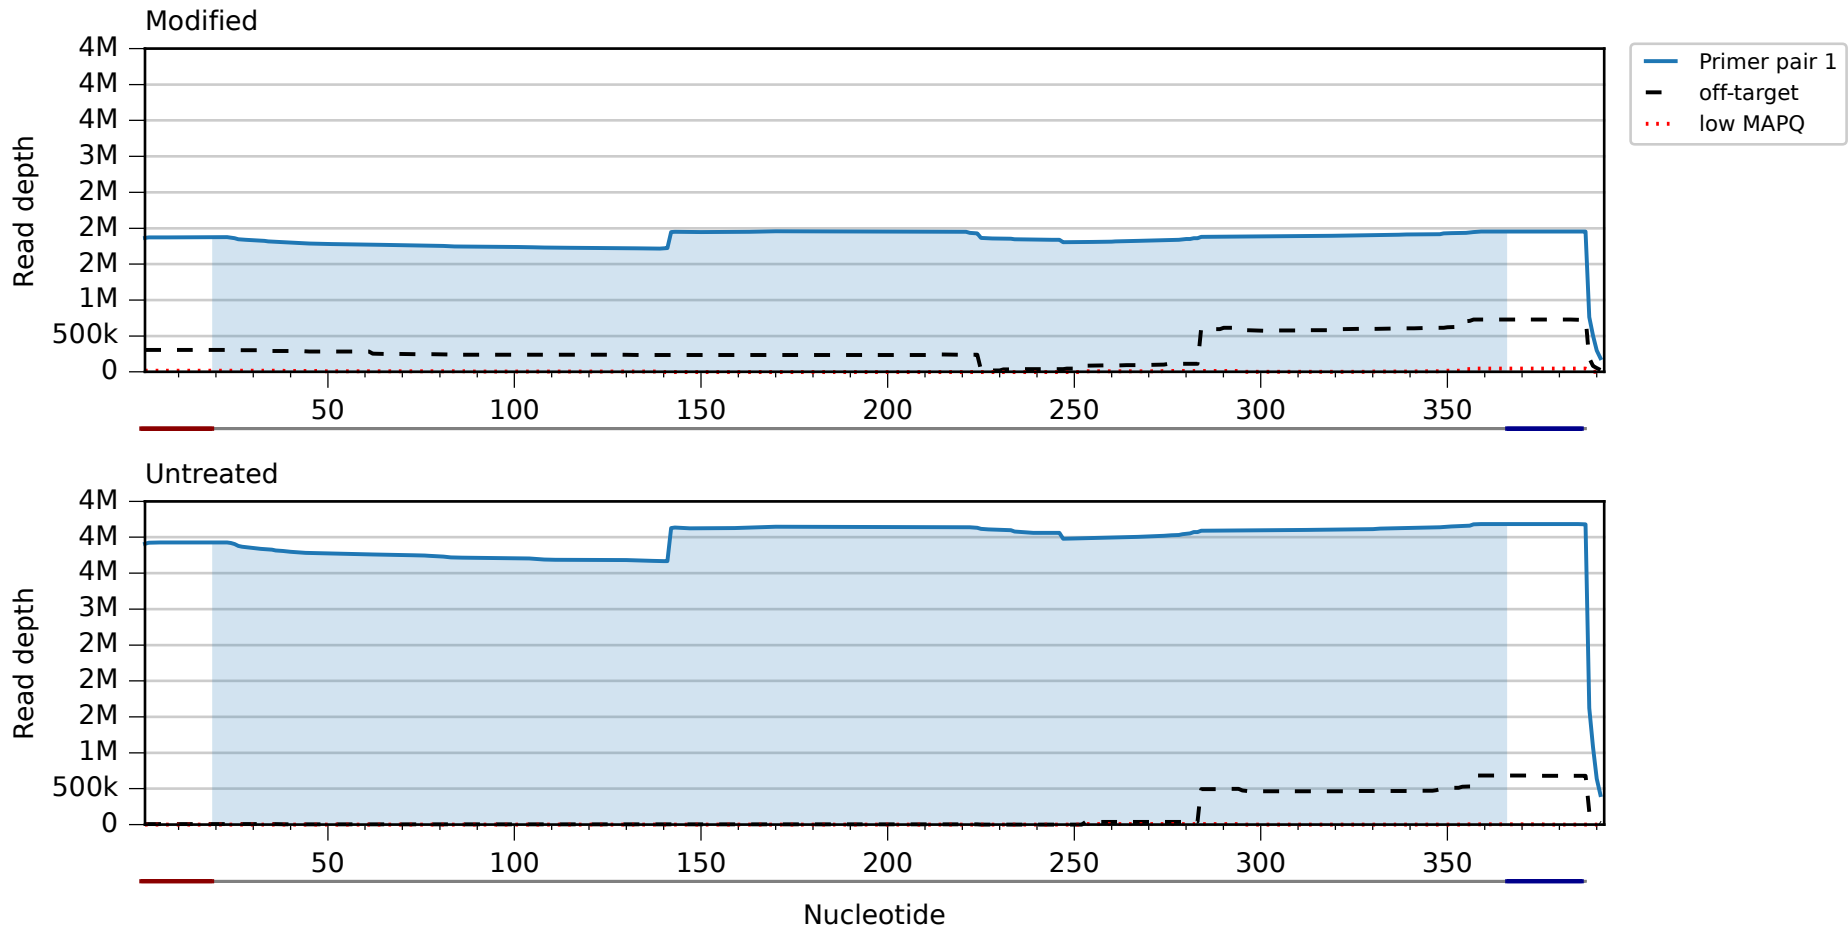

Read depth of ABAT PAS RNA SHAPE-MaP data from Replicate 2

Shape reactivity, mutation rate and read depth of ABAT PAS RNA  
SHAPE-MaP Replicate 2

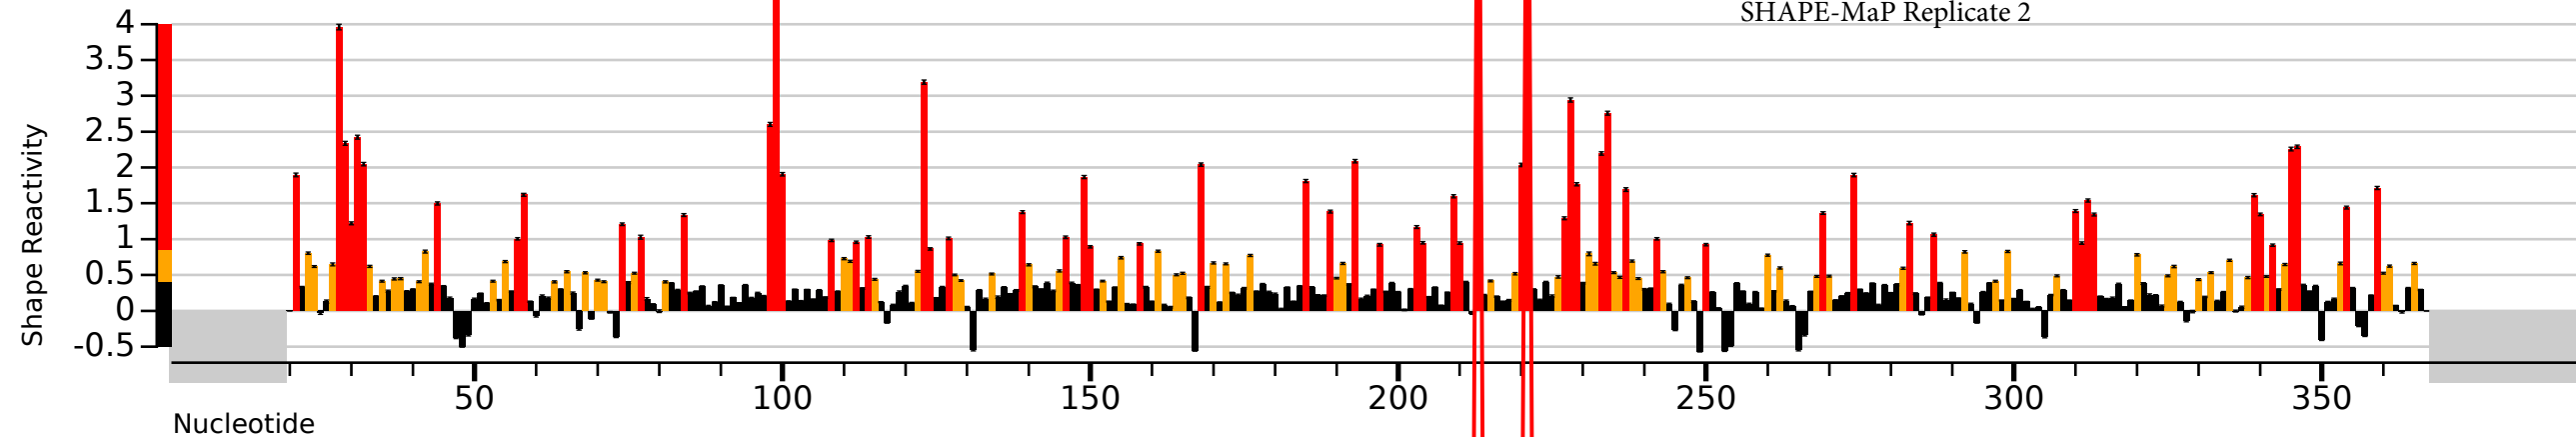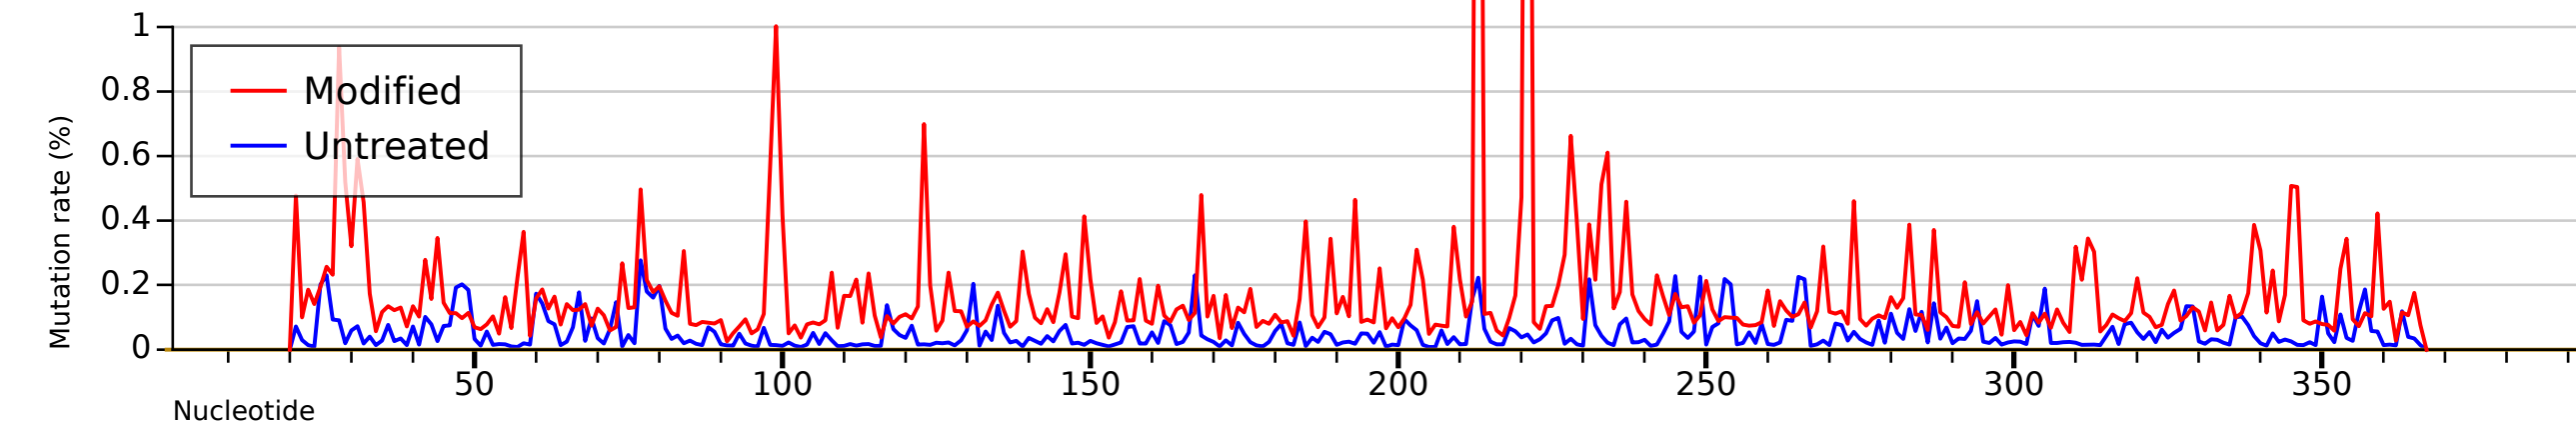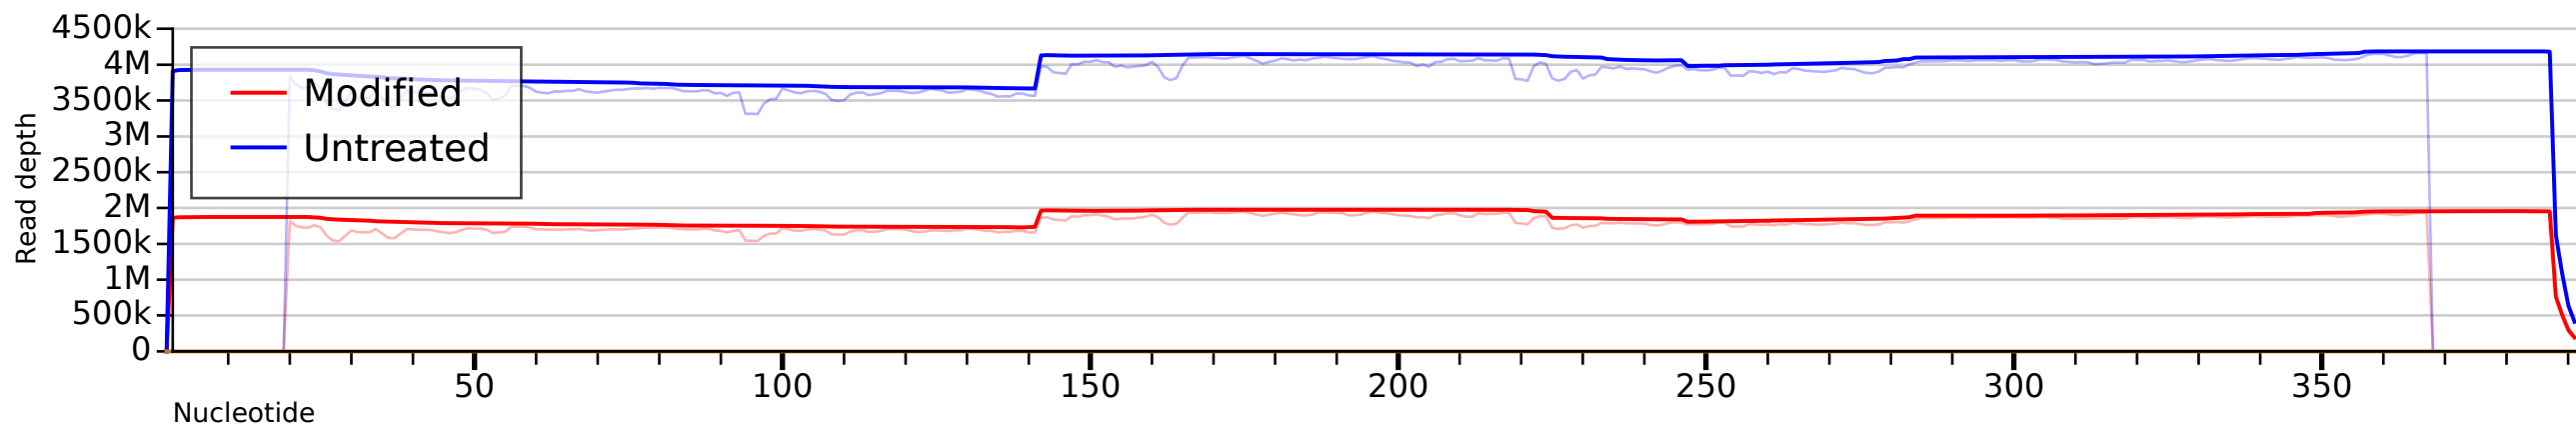

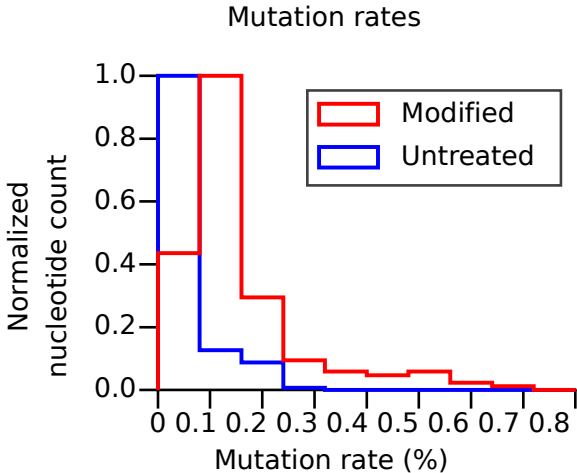

Mutation rates of ABAT PAS RNA  
SHAPE-MaP analysis combined Replicate  
1 and Replicate 2

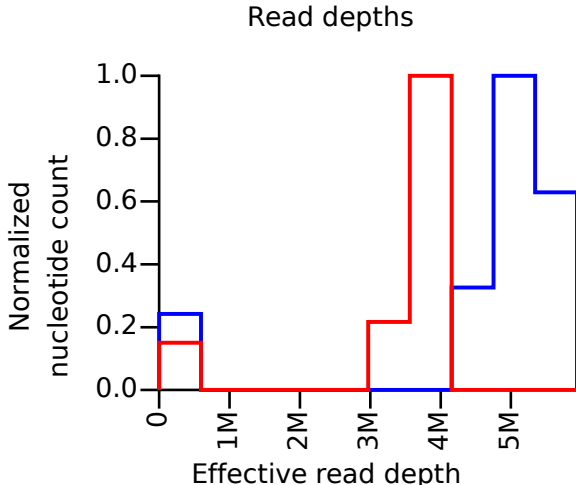

Read depths of ABAT PAS RNA SHAPE-  
MaP analysis combined Replicate 1 and  
Replicate 2

ABAT PAS RNA SHAPE-MaP  
combined Rep 1 and Rep 2

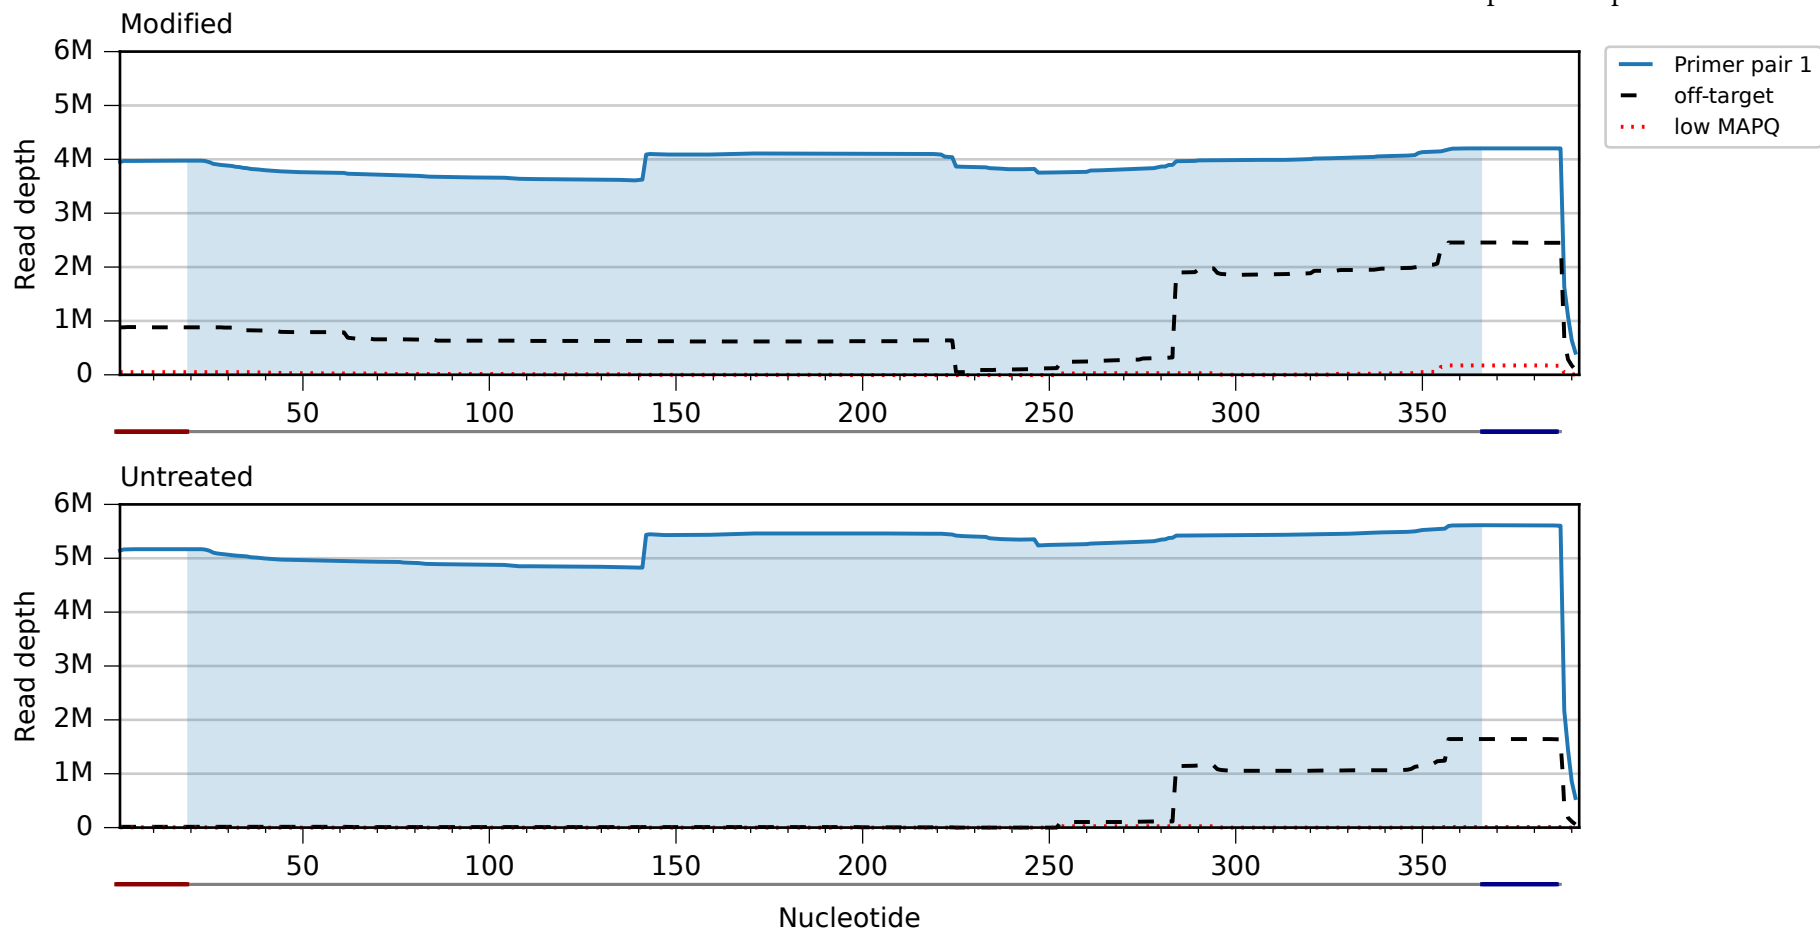

Read depth of ABAT PAS RNA SHAPE-MaP analysis combined Replicate 1 and Replicate 2



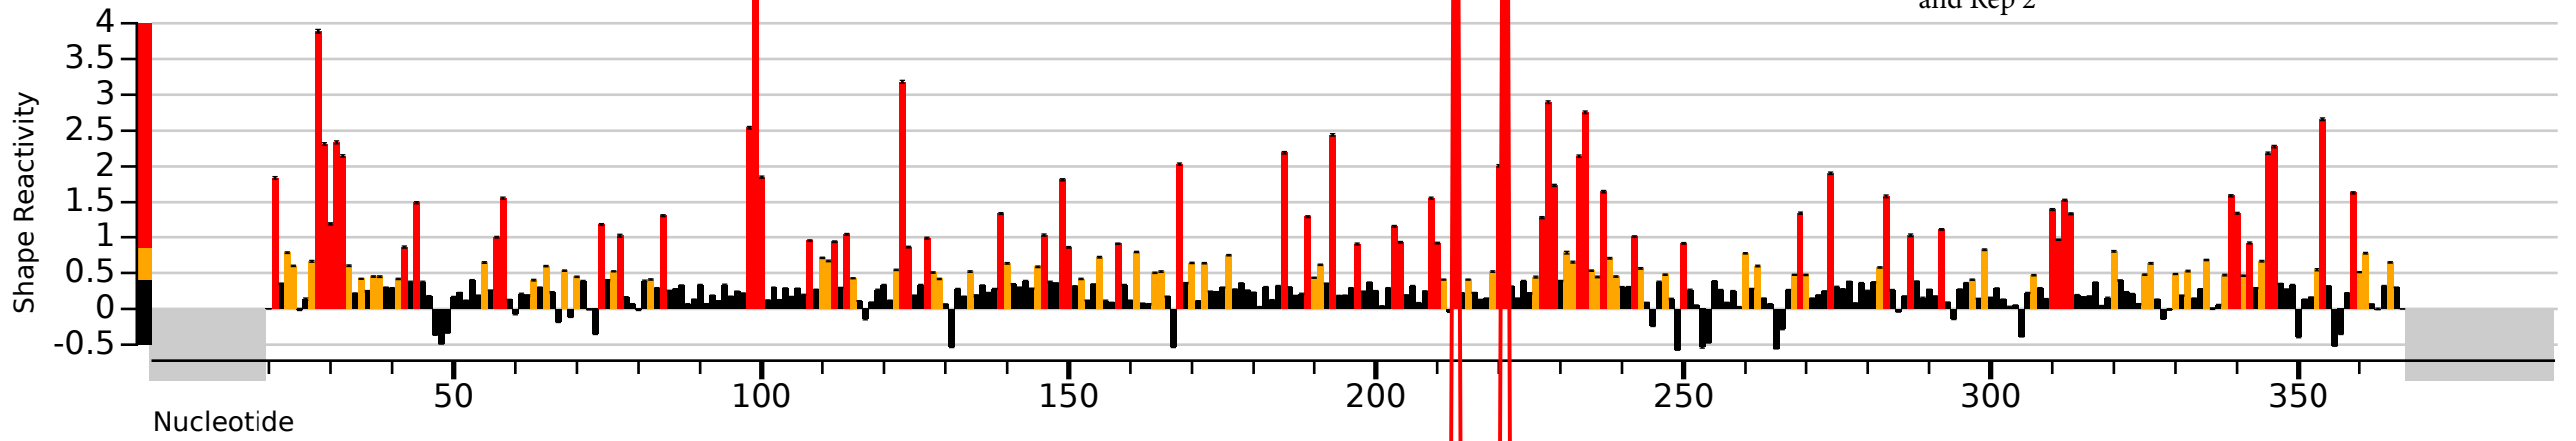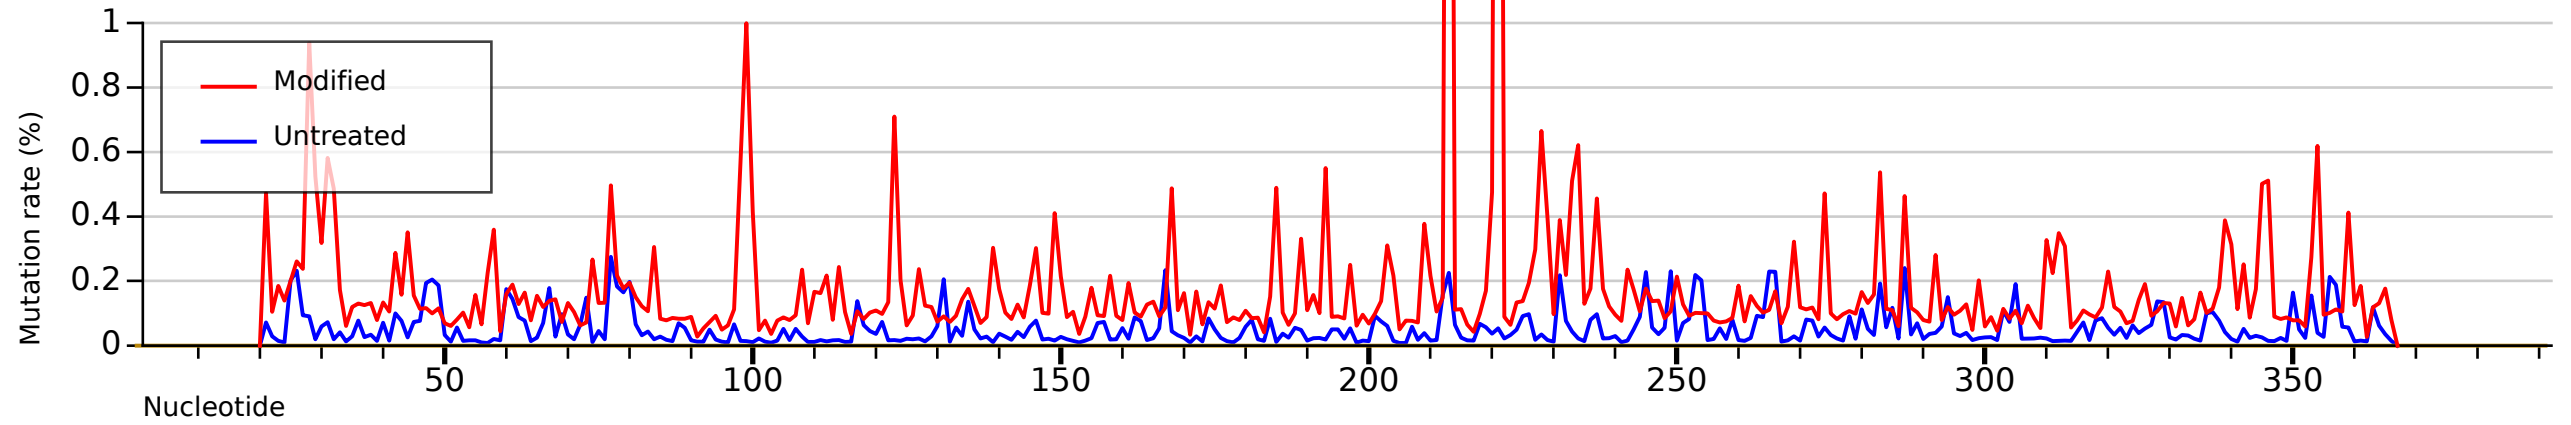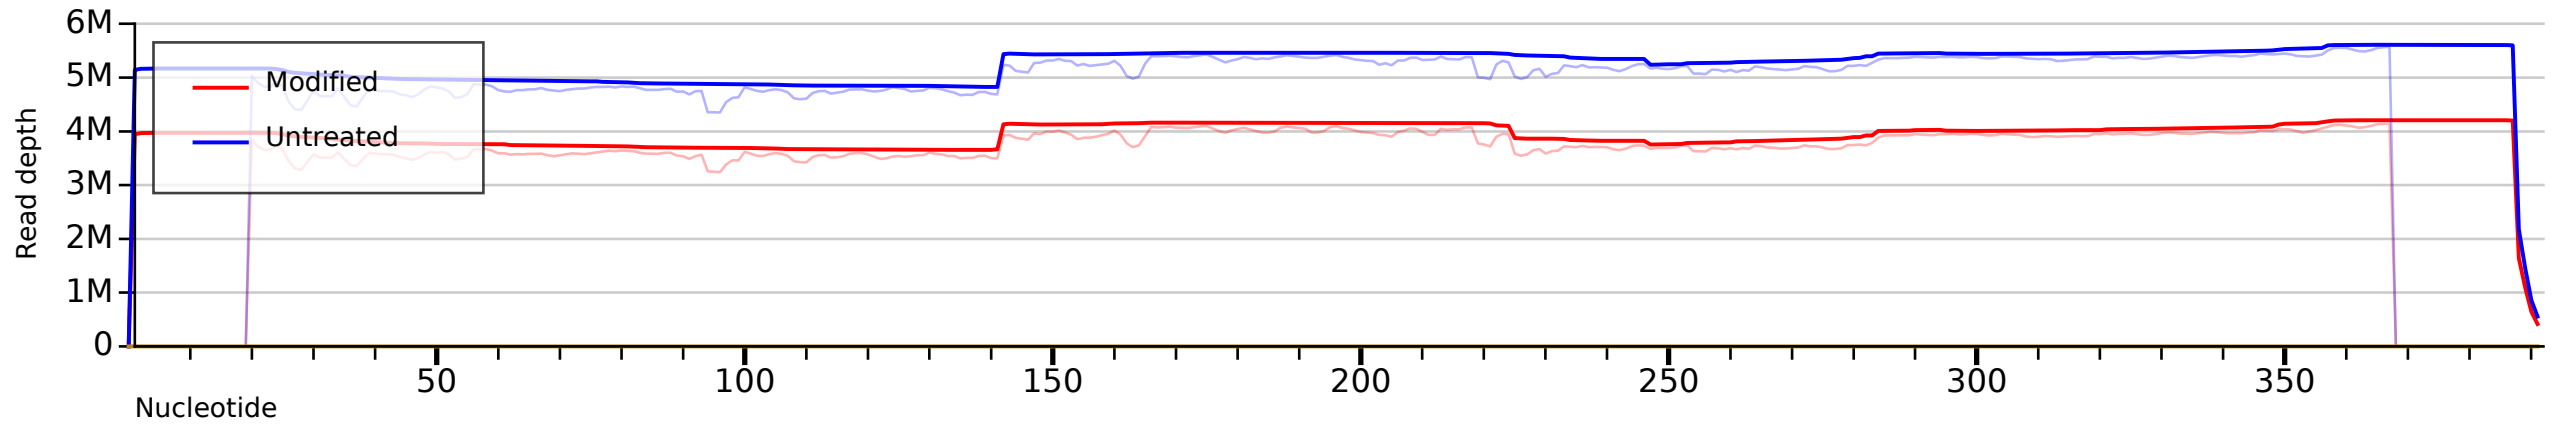

Secondary structure models from SHAPE-MaP reactivities for ABAT-PAS RNA

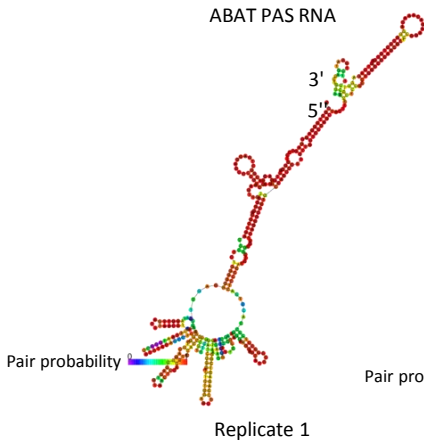

Secondary structure of ABAT PAS RNA based on SHAPE-MaP Replicate 1 data

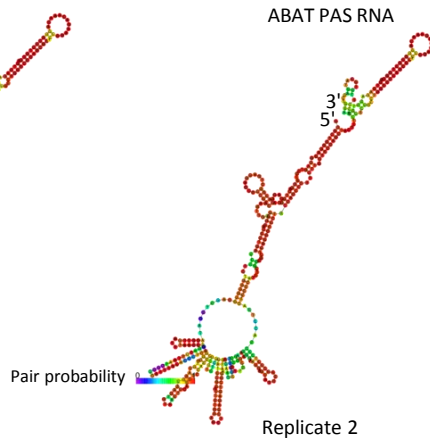

Secondary structure of ABAT PAS RNA based on SHAPE-MaP Replicate 2 data

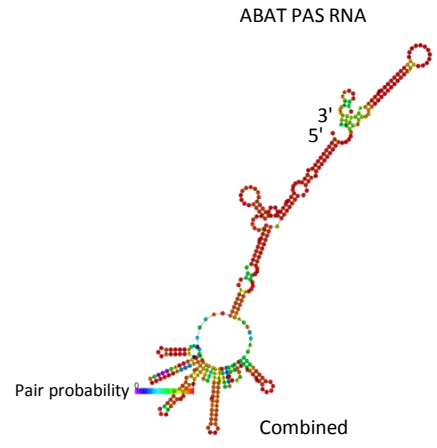

Secondary structure of ABAT PAS RNA based on SHAPE-MaP data combined Replicate 1 and Replicate 2
